# Supplementary material
Source: Research Square preprint supplement (doi:10.21203/rs.3.rs-7129105/v1)
Supplement: Supplementary file 1 [file 9ea5336678d1b86fecd65ad0.docx]

**Supplementary Information**

**
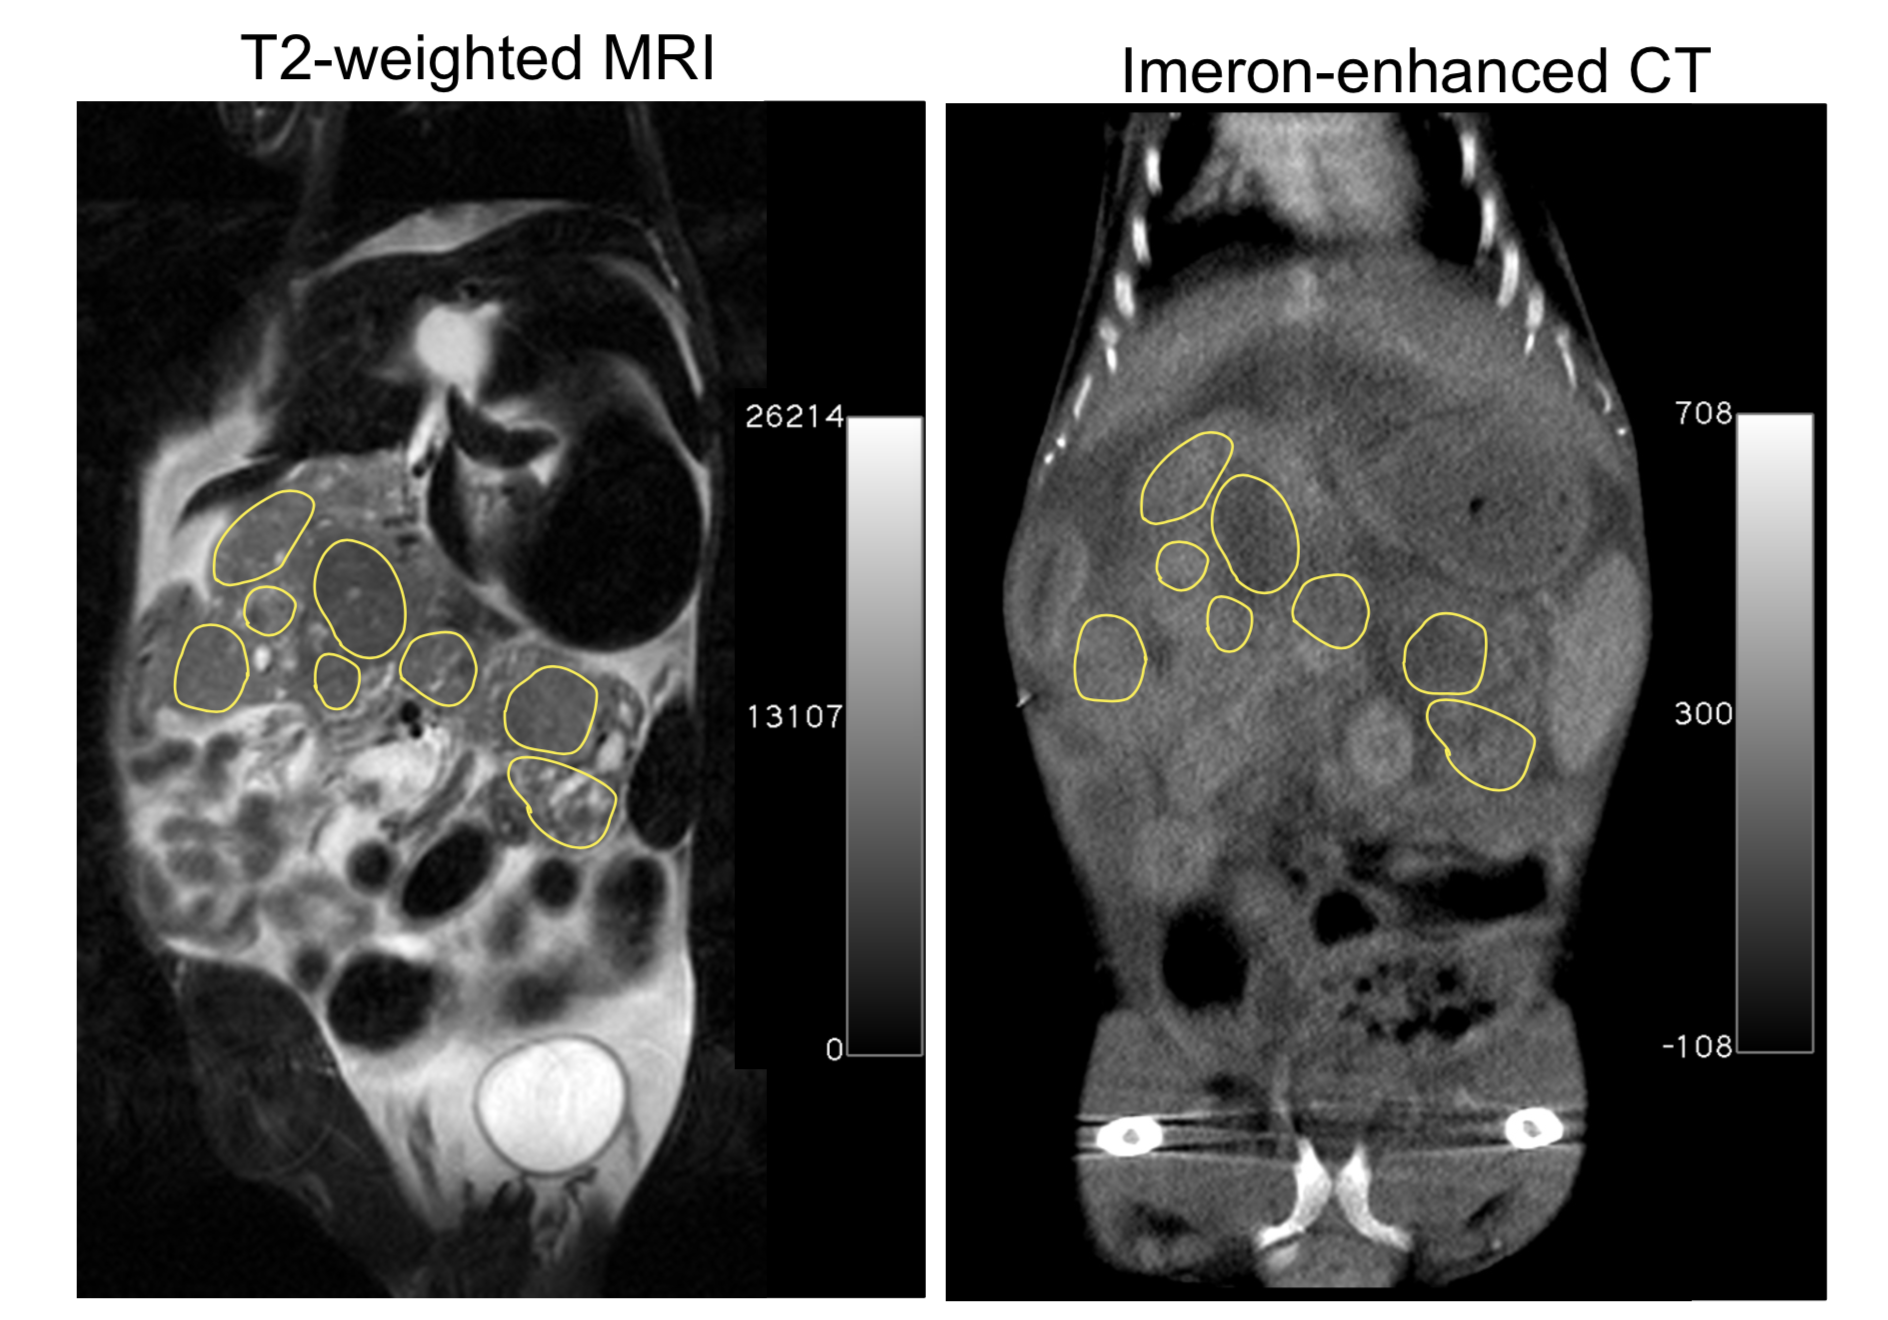
**

**Suppl. Fig. 1.** Coronal T2w MRI (left) and CE-µCT (right) images obtained within the first 63 seconds after CA injection of the same anatomical region showing high tumor heterogeneity. Manually placed ROIs are indicated as overlay.
